# Supplementary material
Source: PubMed Central journal article supplement (PMC5675441)
Supplement: mmc1.pdf [file mmc1.pdf]

**YMTHE, Volume 25**

**Supplemental Information**

**Adnectin-Based Design of Chimeric Antigen**

**Receptor for T Cell Engineering**

**Xiaolu Han, Gunce E. Cinay, Yifan Zhao, Yunfei Guo, Xiaoyang Zhang, and Pin Wang**

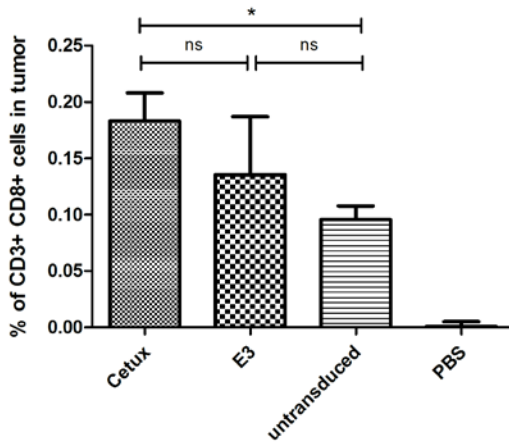

**Figure S1.** Trafficking of CAR-T cells in the human lung cancer xenograft NSG mice model. NCI-H292 cells were inoculated into the right flank of NSG mice on day 0. When the average tumor size reached around 120 mm<sup>3</sup> on day 19 after tumor inoculation, the tumor-bearing mice were randomized into tumor size rank matched cohorts (n = 8 per treatment group), and then treated with 4 million CAR-T cells through intravenous injection on day 19 and 33. On day 42, the tumor tissues were harvested and processed into single cell suspension, and then stained with T cell marker antibodies for enumeration by flow cytometry. Mean ± SEM of CD3<sup>+</sup> CD8<sup>+</sup> T cell number was shown. Student's t-test was employed to assess the differences among groups (ns = not significant, P > 0.05; \*, P < 0.05).

DNA Sequence of various adnectins:

E1:

ATGGGAGTGTCTGATGTGCCAAGAGACCTGGAGGTGGTAGCCGCCACGCCGACAAGTCTCTTGA  
TCTCATGGGACAGCGGGAGAGGTTCCCTACCAATACTATCGAATCACGTACGGAGAAACAGGCGG  
AAACTCCCCTGTTTCAGGAGTTCACAGTGCCCGGTCCCCTGCACACTGCAACCATCAGTGGCCTT  
AAGCCGGGTGTAGACTATAACCATCACAGTGTATGCAGTAACTGATCATAAGCCTCACGCAGACG  
GCCCCACACCTACCATGAGTCTCCCATTTCTATTAATTACAGAACTGAGATCGACAAG

E2:

ATGGGAGTGTCTGATGTGCCAAGAGACCTGGAGGTGGTAGCTGCTACCCCTACGTCCTTGCTCA  
TCTCTTGGTTGCCCGCAAATTGCGATACCAGTATTATCGGATTACCTATGGCGAGACCGGGGG  
GAACTCCCCCGTGCAGGAGTTTACAGTACCTCATGACCTGAGAACAGCAACTATAAGCGGCCTT  
AAGCCCGGTGTGGACTATACTATAACGGTGTACGCAGTGACTAACATGATGCATGTGGAATACA  
GCGAGTATCCCATTTCTATTAATTACAGAACTGAGATCGACAAG

E3:

ATGGGAGTGTCTGATGTGCCAAGAGACCTGGAGGTGGTCGCCGCAACACCGACCAGCCTGCTGA  
TCAGTTGGGTTCGCAGGAGCAGAAGACTATCAGTATTACAGGATCACCTACGGTGAAACGGGGGG  
AAATTTCCCCTGTGCAGGAGTTTACTGTGCCTCATGACCTCGTAACCGCGACCATCTCTGGCCTG  
AAGCCTGGGGTGGACTACACCATTACCGTGTACGCGGTCACGGACATGATGCACGTGGAATACA  
CCGAGCACCCCATTTCTATTAATTACAGAACTGAGATCGACAAG

E4:

ATGGGAGTGTCTGATGTGCCAAGAGACCTGGAGGTGGTTGCCGCAACACCTACATCACTTCTCA  
TCTCCTGGTGGGCCCTGTGGATAGGTATCAGTACTACCGGATCACATACGGTGAAACTGGCGG  
AAATTTCCCCTGTTTCAGGAGTTCACCGTGCCAGGGACGTGTACACCGCCACTATCAGCGGTCTT  
AAACCAGGAGTCGATTACACGATCACGGTGTACGCTGTCACCGATTATAAACCCACGCCGATG  
GGCCACATACCTACCATGAATCCCCCATTTCTATTAATTACAGAACTGAGATCGACAAG
